# Supplementary material
Source: PubMed Central journal article supplement (PMC2823449)

## Supplemental Figure Legends

### Figure S 1. Activation of $\beta$ -catenin/TCF signaling in short-term versus long-term cultures

(A) qPCR analysis of Axin2 message from freshly isolated (Day<sub>0</sub>) AT2 cells and cells cultured for 2, 7 and 14 days. Mean values from triplicate qPCR measurements +/- standard deviations are shown. (B) Immunoblot analysis of AT2 lysates (20 $\mu$ g) from freshly isolated cells (Day<sub>0</sub>) and cells plated in culture for 2-14 days. Note that in this experiment, the total level of  $\beta$ -catenin was very different between Day<sub>0</sub> and Day<sub>2</sub> cells (in contrast to Fig. 1D), due to variable contamination by red blood cells that lack  $\beta$ -catenin. Nonetheless, when amounts of AT2 lysates are corrected for the same level of total  $\beta$ -catenin (60 $\mu$ g of Day<sub>0</sub> lysate versus 20 $\mu$ g of Day<sub>2</sub> lysate), the activated form of  $\beta$ -catenin (ABC) is still upregulated relative to the total  $\beta$ -catenin pool (pan- $\beta$ -catenin). (C) Immunofluorescence analysis of rat AT2 cells plated on filters and cultured for 2 or 14 days at an air (apical)/liquid (basolateral) interface. Note that the cells visibly flatten and increase their surface area in these cultures, and the signaling form of  $\beta$ -catenin appears to be more visibly recruited to cell-cell junctions. Scale bar = 10 $\mu$ m. (D) The signaling active form of  $\beta$ -catenin is a fraction of the total cellular pool of  $\beta$ -catenin. Immunoblot analysis of AT2 lysate compared with defined amounts (0.003-0.3 $\mu$ g) of recombinant  $\beta$ -catenin reveals that 50 $\mu$ g of AT2 lysate contains ~0.03 $\mu$ g of ABC compared with 0.3 $\mu$ g of total  $\beta$ -catenin.

### Figure S 2. Signaling form of $\beta$ -catenin is detected in airway but not alveolar epithelial cells.

(A) Immunoblot detection ABC in adult rat lung total homogenate. (B-G) Adult rat lung paraffin sections incubated with (B) GAM-HRP secondary alone, (C) anti-pan- $\beta$ -catenin (recognizes all forms of  $\beta$ -catenin), (D&E), anti-de-phospho-Activated  $\beta$ -catenin (ABC, 8E7), (F) anti-de-phospho-GSK-epitope- $\beta$ -catenin (06-734, Millipore) and (G) anti-Wnt1 and processed for immunohistochemistry. (H-J) Immunofluorescence-double labeling from the same rat lung

block using dephospho- $\beta$ -catenin, ABC and CC10 antibodies.

**Figure S 3. Wnt/ $\beta$ -catenin signaling reporter mouse (Axin2<sup>+LacZ</sup>) reveals no baseline activity in adult mouse lung.** Reporter mice (~20gms) were injected (IP) with 0.66mls of normal saline (**A**) or a 0.15M solution of LiCl (**B&C**) for three days. Lungs were harvested and processed for X-gal staining and paraffin embedding using standard procedures as described in Methods. Note that both small and large airways are most sensitive to activation of the Axin2<sup>+LacZ</sup> reporter compared with the alveolar compartment.

block using dephospho- $\beta$ -catenin, ABC and CC10 antibodies.

**Figure S 3. Wnt/ $\beta$ -catenin signaling reporter mouse (Axin2<sup>+LacZ</sup>) reveals no baseline activity in adult mouse lung.** Reporter mice (~20gms) were injected (IP) with 0.66mls of normal saline (**A**) or a 0.15M solution of LiCl (**B&C**) for three days. Lungs were harvested and processed for X-gal staining and paraffin embedding using standard procedures as described in Methods. Note that both small and large airways are most sensitive to activation of the Axin2<sup>+LacZ</sup> reporter compared with the alveolar compartment.

Fig. S1

**A**

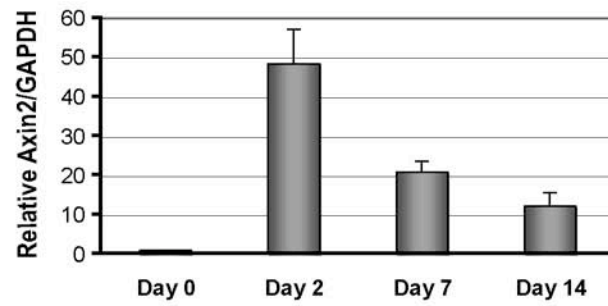

**B**

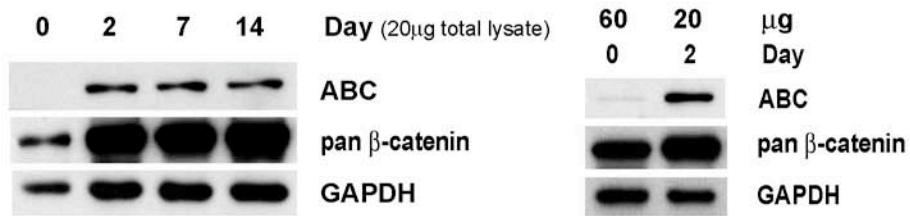

**C**

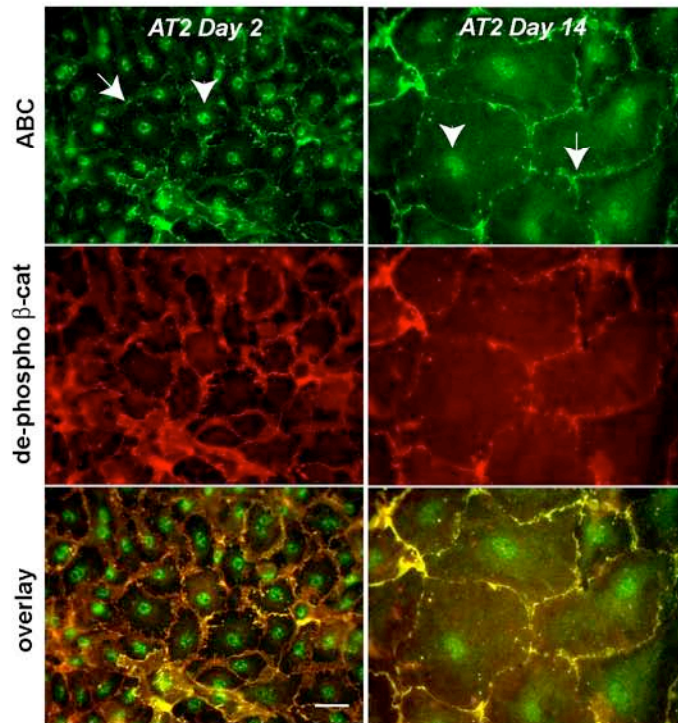

**D**

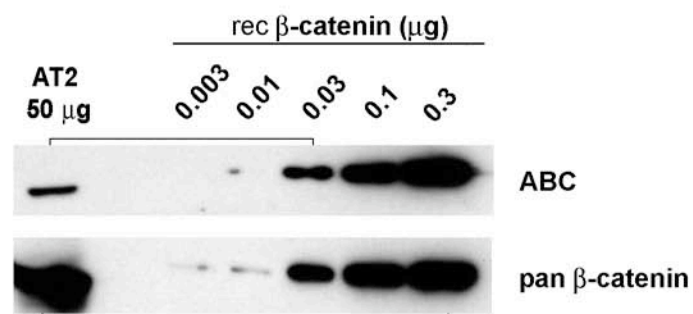

Fig. S2

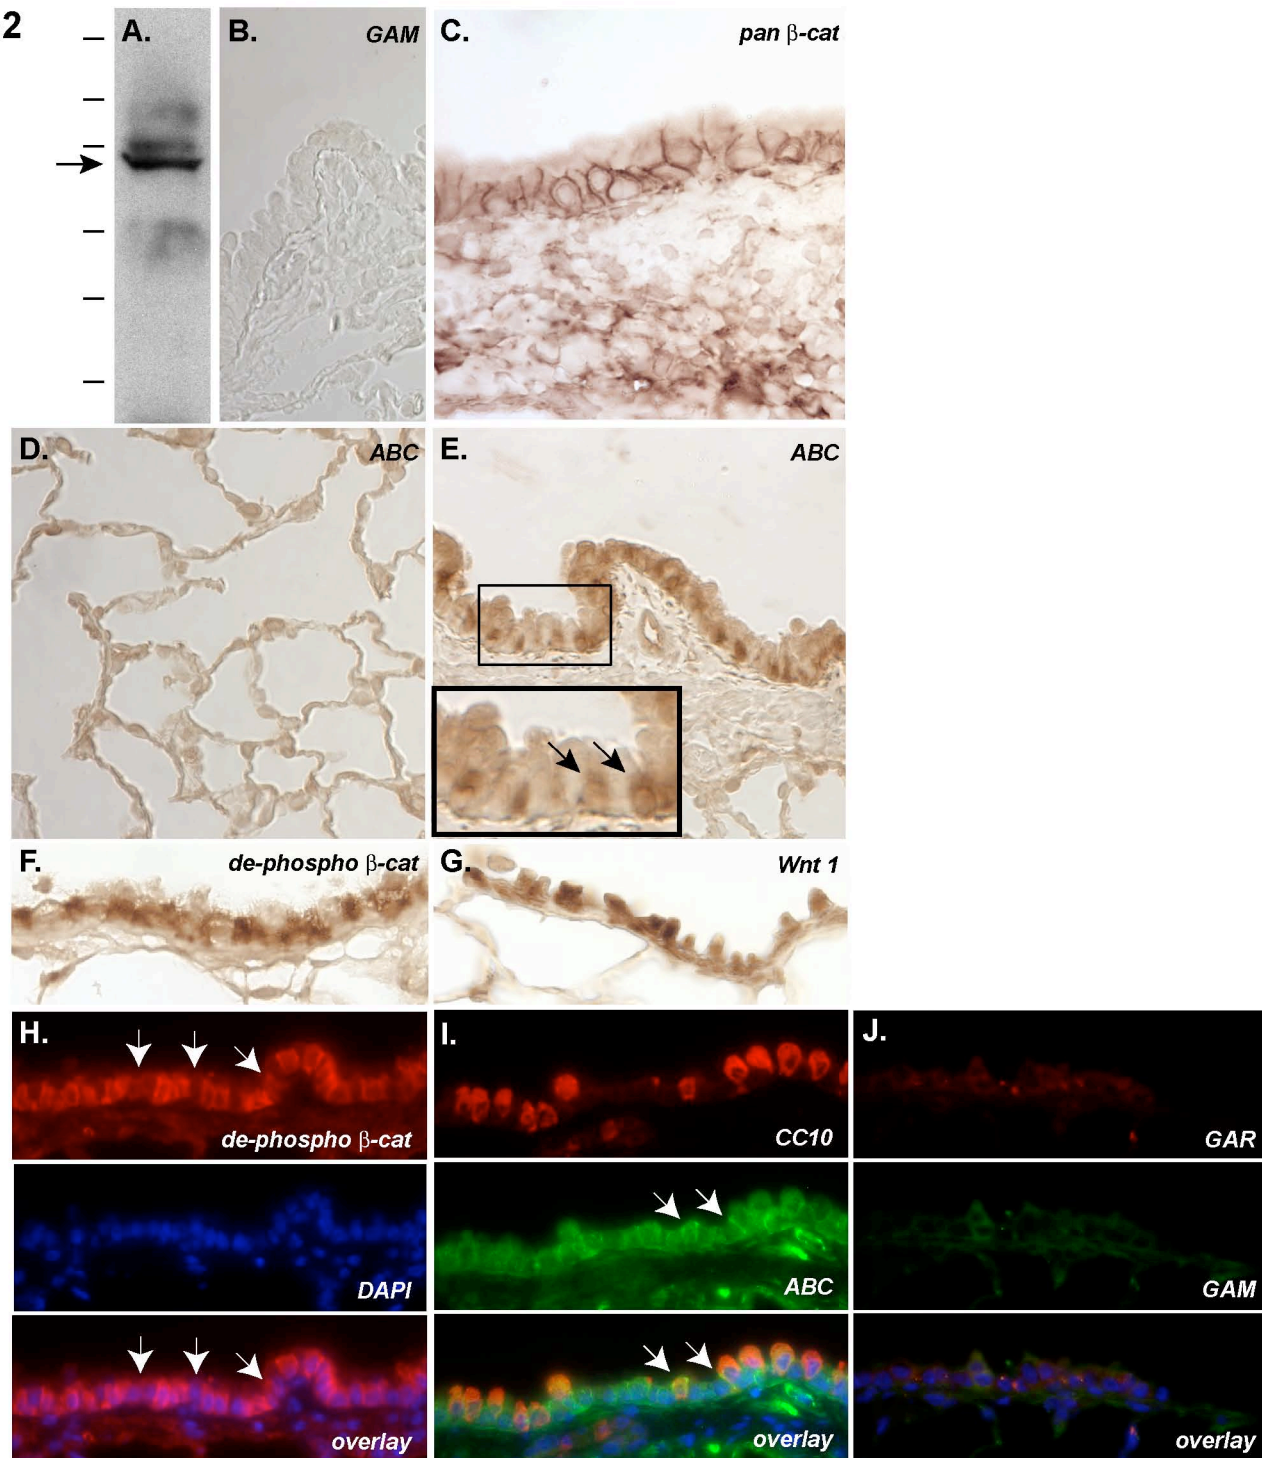

Fig. S3

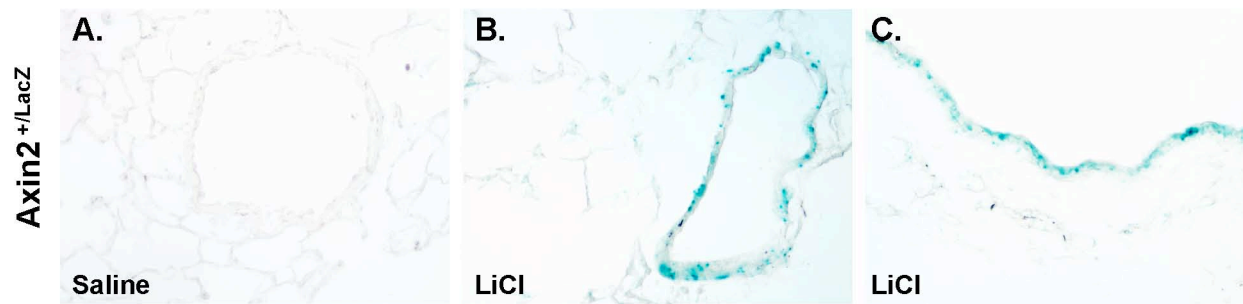

Supplement: supp_M109.070326_jbc.M109.070326-1.pdf [file supp_M109.070326_jbc.M109.070326-1.pdf]
